# Supplementary material for: Highly sensitive metal-grid strain sensors via water-based solution processing
Source: Royal Society of Chemistry journal article supplement (doi:10.1039/c8ra08721k), 2018-01-01
Supplement: c8ra08721k1.pdf [file c8ra08721k1.pdf]

## Supplementary Information

### Highly sensitive metal-grid strain sensors via water-based solution processing

*Seungwoo Oh, Jin Kim, and Suk Tai Chang\**

School of Chemical Engineering and Materials Science, Chung-Ang University  
84 Heukseok-ro, Dongjak-gu, Seoul 06974, Republic of Korea  
E-mail: stchang@cau.ac.kr

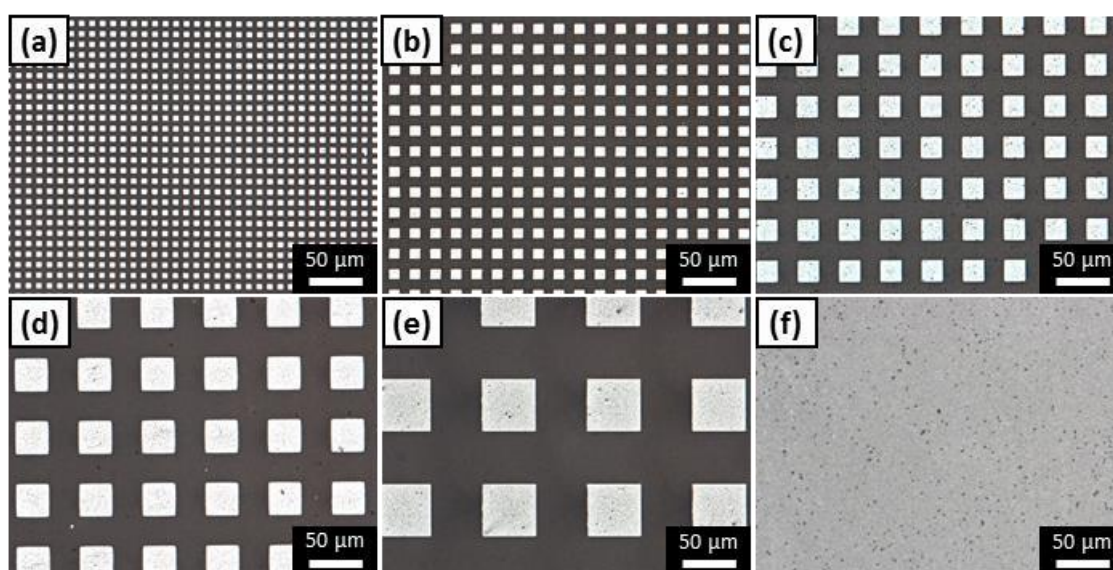

**Fig. S1.** Optical microscopic images of metal grid structures on PDMS with sizes of (a) 5:5 (width:spacing, μm), (b) 10:10 (c) 20:20 (d) 30:30 (e) 50:50 (f) complete metal film without pattern.

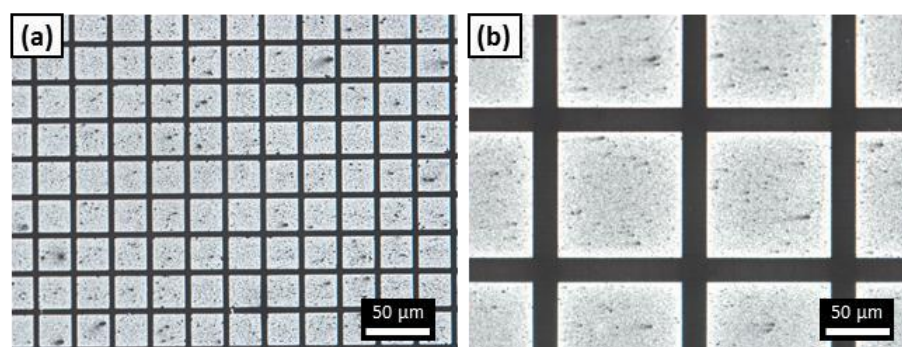

**Fig. S2.** Optical microscopic images of metal grid structures on PDMS with sizes of (a) 5:25, (b) 20:100.

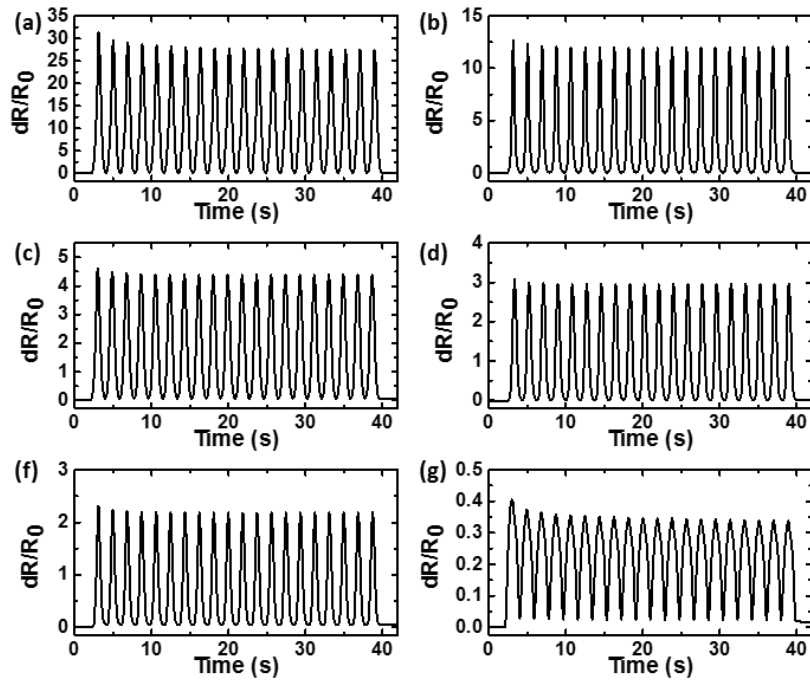

**Fig. S3.** Piezoresistance curves from repeated stretch/release cycles up to a strain,  $\epsilon = 3\%$  using strain sensors with different width and same width/spacing ratio. (a) 5:5, (b) 10:10, (c) 20:20, (d) 30:30, (e) 50:50, (f) whole film.

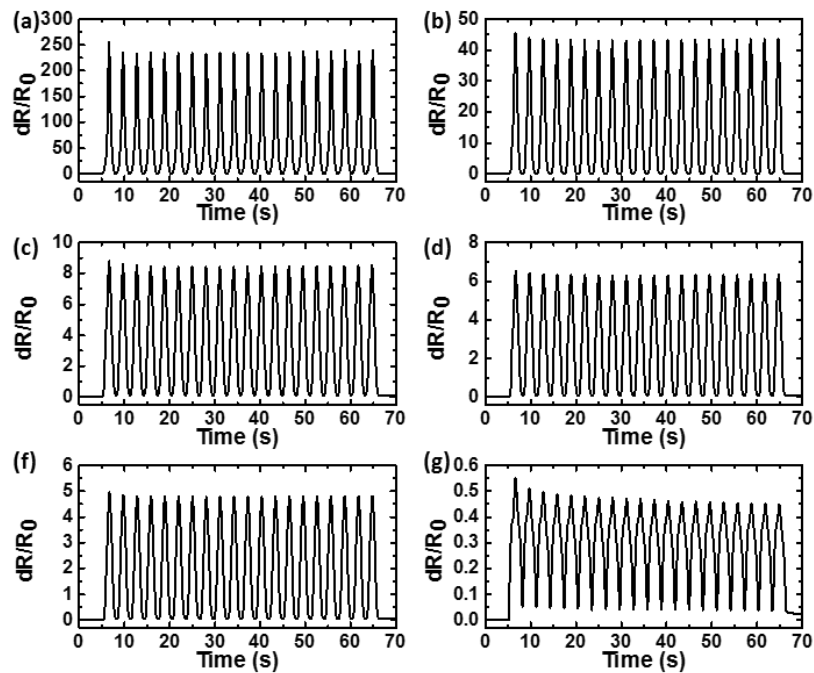

**Fig. S4.** Piezoresistance curves from repeated stretch/release cycles up to strain,  $\epsilon = 5\%$  using strain sensors with different width and same width/spacing ratio. (a) 5:5, (b) 10:10, (c) 20:20, (d) 30:30, (e) 50:50, (f) whole film.

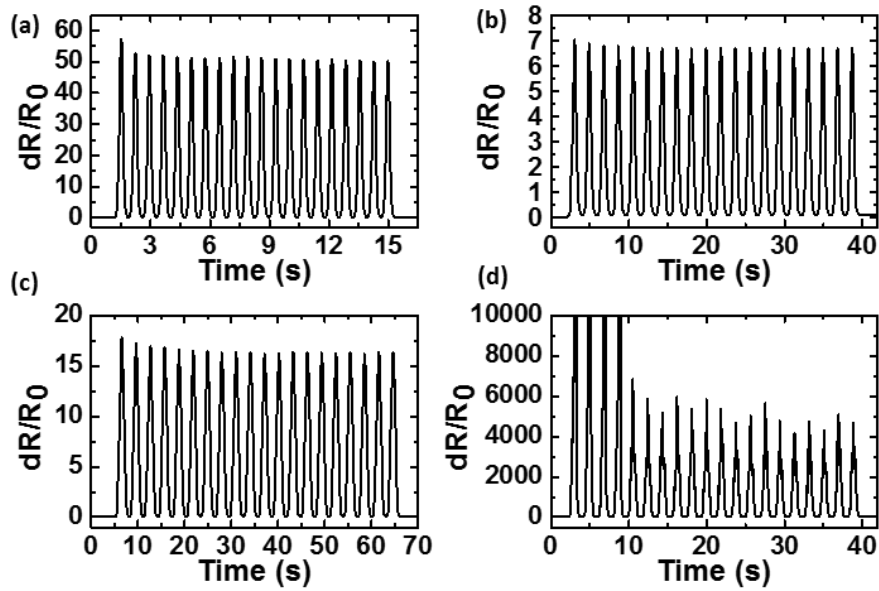

**Fig. S5.** Piezoresistance curves from repeated stretch/release cycles up to  $\epsilon = 3\%$  or  $5\%$  using strain sensors with different size (width:spacing,  $\mu\text{m}$ ). (a) 20:100, up to  $\epsilon = 3\%$ , (b) 20:100, up to  $\epsilon = 5\%$ , (c) 5:25, up to  $\epsilon = 3\%$  (d) 5:25, up to  $\epsilon = 5\%$ .

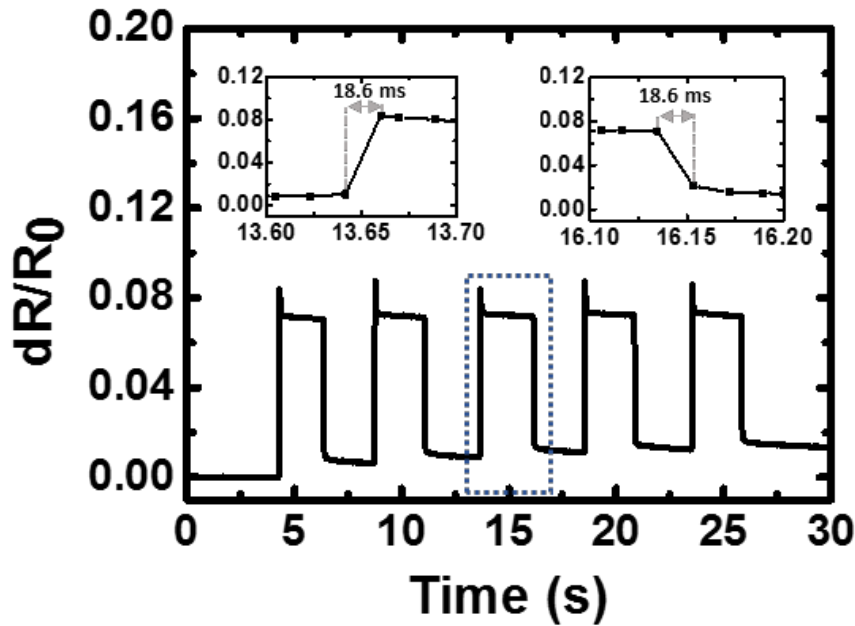

**Fig. S6.** Relative changes in resistance of 5:5 metal grid strain sensor as a function of time with cyclic stretch/release at  $\epsilon = 0.2\%$ . Insets show response time of 5:5 grid strain sensor at both stretch and release motion.

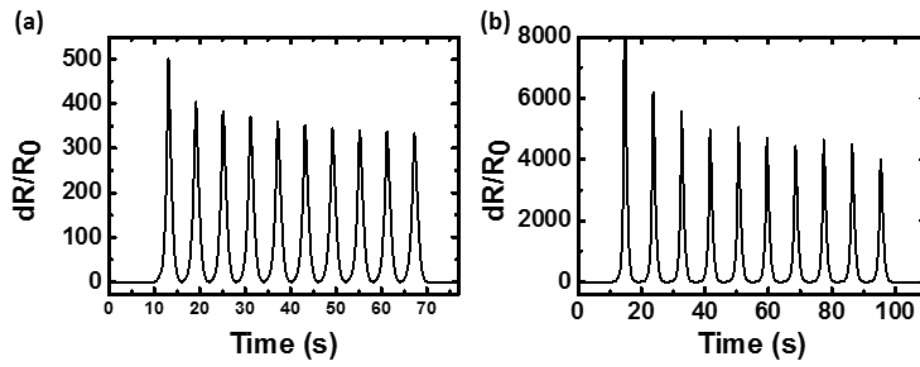

**Fig. S7.** Electrical response converted from tensile strain up to (a)  $\epsilon = 10\%$ , (b)  $\epsilon = 15\%$  using a 5:5 grid strain sensor.

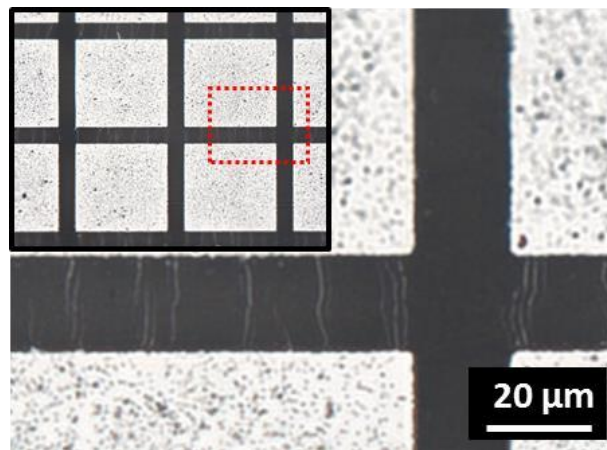

**Fig. S8.** OM image of 20:100 grid strain sensor as strained,  $\epsilon = 3\%$ . Inset is a lower magnification image, where the region indicated by the red box is shown in the higher magnification image.

**Table S1.** Comparison of the performance and methods of recently reported strain sensors.

| Reference        | Material              | Fabrication method                                              | Structure                                          | Gauge Factor  | Max. Strain (%) | Response Time               |
|------------------|-----------------------|-----------------------------------------------------------------|----------------------------------------------------|---------------|-----------------|-----------------------------|
| 1                | Pt/PUA                | Sputtering                                                      | Metal film /Elastomer                              | 2000          | 2               | $\geq 659$ Hz <sup>a)</sup> |
| 2                | Pt/PUA                | Sputtering                                                      | Metal film /Elastomer                              | 16000         | 2               | $\geq 50$ Hz <sup>a)</sup>  |
| 3                | Pt/PU                 | Magnetron sputtering                                            | Metal film /Elastomer                              | 30            | 150             | < 30 ms                     |
| 4                | Pt/PUA                | -                                                               | Metal coating /Nanofiber                           | 11.45         | 5               | $\geq 10$ Hz <sup>a)</sup>  |
| 5                | Au/PDMS               | Electron beam evaporation                                       | Metal film /Elastomer                              | 5000          | 1               | 988 Hz <sup>a)</sup>        |
| 6                | AuNP/PET              | Convective assembly                                             | AuNP/Film                                          | 300           | -               | > 20000 Hz <sup>a)</sup>    |
| 7                | CrNP/Ag /PET          | Magnetron sputtering /Mask evaporation deposition               | CrNP/Interdigital electrode/Film                   | 100           | 3               | -                           |
| 8                | Ag NP /PDMS           | Stamping                                                        | Metal NP film /Elastomer                           | 2.05          | 20              | -                           |
| 9                | AgNW /PDMS            | Drop casting                                                    | Elastomer /Metal NW film /Elastomer                | 2-14          | 70              | ~ 200 ms                    |
| 10               | AuNW /PDMS            | Dipping                                                         | Elastomer/AuNP /Interdigital Electrode (Elastomer) | 7.38          | 25              | < 17 ms                     |
| 11               | Graphite /Ecoflex     | Bar coating                                                     | Carbon film/Elastomer                              | 522.6-11344   | >50             | 14 Hz <sup>a)</sup>         |
| 12               | CB/Paper              | Solvent mixing /Brushing                                        | Carbon film/Paper                                  | 647           | 0.22            | 0.625 s                     |
| 13               | PEI-rGO /PDMS         | Dipping /Spin coating                                           | Elastomer /Carbon-multilayer /Elastomer            | 754           | 5               | ~ 0.6 s                     |
| 14               | CNT /PDMS             | Filtering /Spin coating                                         | Carbon paper /Elastomer                            | $10^7$        | 50              | 300 ms                      |
| <b>This work</b> | <b>Ag/AuNPs /PDMS</b> | <b>Solution process (Ag enhancement on AuNPs) /Spin coating</b> | <b>Grid metal /Elastomer</b>                       | <b>4685.9</b> | <b>5</b>        | <b>18.6 ms</b>              |

a) When the response time is not given in the report, response time is estimated by the highest frequency.

## References

- 1 D. Kang, P. V. Pikhitsa, Y. W. Choi, C. Lee, S. S. Shin, L. Piao, B. Park, K-Y. Suh, T.-I Kim and M. Choi, *Nature*, 2014, **516**, 222–226.

- 2 B. Park, J. Kim, D. Kang, C. Jeong, K. S. Kim, J. U. Kim, P. J. Yoo and T.-I. Kim, *Adv. Mater.*, 2016, **28**, 8130–8137.
- 3 H. Jeon, S. K. Hong, M. S. Kim, S. J. Cho and G. Lim, *ACS Appl. Mater. Interfaces*, 2017, **9**, 41712–41721.
- 4 C. Pang, G.-Y. Lee, T.-I. Kim, S.-M. Kim, H. N. Kim, S. H. Ahn and K.-Y. Suh, *Nat. Mater.*, 2012, **11**, 795–801.
- 5 T. Yang, X. Li, X. Jiang, S. Lin, J. Lao, J. Shi, Z. Zhen, Z. Li and H. Zhu, *Mater. Horizons*, 2016, **3**, 248–255.
- 6 L. Yi, W. Jiao, K. Wu, L. Qian, X. Yu, Q. Xia, K. Mao, S. Yuan, S. Wang and Y. Jiang, *Nano Res.*, 2015, **8**, 2978–2987.
- 7 M. Zheng, W. Li, M. Xu, N. Xu, P. Chen, M. Han and B. Xie, *Nanoscale*, 2014, **6**, 3930–3933.
- 8 J. Lee, S. Kim, J. Lee, D. Yang, B. C. Park, S. Ryu and I. Park, *Nanoscale*, 2014, **6**, 11932–11939.
- 9 M. Amjadi, A. Pichitpajongkit, S. Lee, S. Ryu and I. Park, *ACS Nano*, 2014, **8**, 5154–5163.
- 10 S. Gong, W. Schwalb, Y. Wang, Y. Chen, Y. Tang, J. Si, B. Shirinzadeh and W. Cheng, *Nat. Commun.*, 2014, **5**, 3132.
- 11 M. Amjadi, M. Turan, C. P. Clementson and M. Sitti, *ACS Appl. Mater. Interfaces*, 2016, **8**, 5618–5626.
- 12 H. Song, J. Zhang, D. Chen, K. Wang, S. Niu, Z. Han and L. Ren, *Nanoscale*, 2017, **9**, 1166–1173.
- 13 X. Ye, Z. Yuan, H. Tai, W. Li, X. Du and Y. Jiang, *J. Mater. Chem. C*, 2017, **5**, 7746–7752.
- 14 J. Zhou, H. Yu, X. Xu, F. Han and G. Lubineau, *ACS Appl. Mater. Interfaces*, 2017, **9**, 4835–4842.
